# Supplementary material
Source: publisher site journal article supplement (https://www.dovepress.com/get_supplementary_file.php?f=279028.docx)
Supplement: Supplementary file 1 [file get_supplementary_file.php]

**Supplementary table 1.** Metabolite levels in different subgroups.

|  | Group I (n=16) | Group II (n=59) | Group III (n=11) | Group IV (n=48) |
| --- | --- | --- | --- | --- |
|  | Mean ± SD | Mean ± SD | Mean ± SD | Mean ± SD |
| Concentration of chylomicrons and extremely large VLDL particles mol/l | 0,00001  ± 0,00001 | 0,00001  ± 0,00001 | 0,00001  ± 0,00001 | 0,00001  ± 0,00001 |
| Total lipids in chylomicrons and extremely largeVLDL mmol/l | 0,01472  ± 0,01333 | 0,02140  ± 0,01460 | 0,01769  ± 0,01514 | 0,02523  ± 0,02060 |
| Phospholipids in chylomicrons and extremely large VLDL mmol/l | 0,00155  ± 0,00163 | 0,00240  ± 0,00178 | 0,00191  ± 0,00185 | 0,00286  ± 0,00255 |
| Totalcholesterol in chylomicrons and extremely large VLDL mmol/l | 0,00264  ± 0,00314 | 0,00387  ± 0,00279 | 0,00326  ± 0,00363 | 0,00450  ± 0,00378 |
| Cholesterol esters in chylomicrons and extremely large VLDL mmol/ | 0,00157  ± 0,00195 | 0,00222  ± 0,00159 | 0,00194  ± 0,00225 | 0,00252  ± 0,00206 |
| Free cholesterol in chylomicrons and extremely large VLDL mmol/l | 0,00107  ± 0,00121 | 0,00165  ± 0,00129 | 0,00132  ± 0,00140 | 0,00198  ± 0,00179 |
| Triglycerides in chylomicrons and extremely large VLDL mmol/l | 0,01053  ± 0,00860 | 0,01514  ± 0,01015 | 0,01252  ± 0,00969 | 0,01786  ± 0,01438 |
| Concentration of very large VLDL particles mol/l | 0,00001  ± 0,00001 | 0,00001  ± 0,00001 | 0,00001  ± 0,00001 | 0,00001  ± 0,00001 |
| Total lipids in very large VLDL mmol/l | 0,02882  ± 0,03662 | 0,04684  ± 0,03952 | 0,03726  ± 0,04166 | 0,05739  ± 0,05230 |
| Phospholipids in very large VLDL mmol/l | 0,00422  ± 0,00624 | 0,00740  ± 0,00663 | 0,00545  ± 0,00724 | 0,00907  ± 0,00886 |
| Total cholesterol in very large VLDL mmol/l | 0,00688  ± 0,00887 | 0,01043  ± 0,00797 | 0,00889  ± 0,01012 | 0,01238  ± 0,01061 |
| Cholesterol esters in very large VLDL mmol/l | 0,00386  ± 0,00472 | 0,00555  ± 0,00413 | 0,00507  ± 0,00528 | 0,00658  ± 0,00538 |
| Free cholesterol in very large VLDL mmol/l | 0,00302  ± 0,00422 | 0,00488  ± 0,00394 | 0,00382  ± 0,00490 | 0,00580  ± 0,00532 |
| Triglycerides in very large VLDL mmol/l | 0,01772  ± 0,02169 | 0,02902  ± 0,02528 | 0,02292  ± 0,02445 | 0,03593  ± 0,03310 |
| Concentration of large VLDL particles mol/l | 0,00001  ± 0,00001 | 0,00001  ± 0,00001 | 0,00001  ± 0,00001 | 0,00001  ± 0,00001 |
| Total lipids in large VLDL mmol/l | 0,12597  ± 0,12512 | 0,18954  ± 0,13818 | 0,15930  ± 0,13631 | 0,22713  ± 0,17155 |
| Phospholipids in large VLDL mmol/l | 0,02158  ± 0,02257 | 0,03360  ± 0,02520 | 0,02731  ± 0,02490 | 0,04031  ± 0,03127 |
| Total cholesterol in large VLDL mmol/l | 0,02855  ± 0,03318 | 0,04305  ± 0,03234 | 0,03747  ± 0,03645 | 0,05149  ± 0,04079 |
| Cholesterol esters in large VLDL mmol/l | 0,01736  ± 0,01803 | 0,02407  ± 0,01636 | 0,02265  ± 0,01927 | 0,02819  ± 0,02017 |
| Free cholesterol in large VLDL mmol/l | 0,01119  ± 0,01531 | 0,01898  ± 0,01634 | 0,01482  ± 0,01731 | 0,02330  ± 0,02096 |
| Triglycerides in large VLDL mmol/l | 0,07584  ± 0,06967 | 0,11289  ± 0,08129 | 0,09453  ± 0,07524 | 0,13533  ± 0,10001 |
| Concentration of medium VLDL particles mol/l | 0,00001  ± 0,00001 | 0,00001  ± 0,00001 | 0,00001  ± 0,00001 | 0,00001  ± 0,00001 |
| Total lipids in medium VLDL mmol/l | 0,33330  ± 0,21433 | 0,43455  ± 0,21431 | 0,39175  ± 0,22820 | 0,49081  ± 0,25751 |
| Phospholipids in medium VLDL mmol/l | 0,06758  ± 0,04185 | 0,08764  ± 0,04174 | 0,07907  ± 0,04452 | 0,09836  ± 0,05044 |
| Total cholesterol in medium VLDL mmol/l | 0,09320  ± 0,06349 | 0,12297  ± 0,05744 | 0,10800  ± 0,07067 | 0,13582  ± 0,06843 |
| Cholesterol esters in medium VLDL mmol/l | 0,05616  ± 0,03700 | 0,07311  ± 0,03171 | 0,06367  ± 0,04174 | 0,07898  ± 0,03667 |
| Free cholesterol in medium VLDL mmol/l | 0,03705  ± 0,02720 | 0,04987  ± 0,02707 | 0,04434  ± 0,02925 | 0,05684  ± 0,03281 |
| Triglycerides in medium VLDL mmol/l | 0,17252  ± 0,11104 | 0,22393  ± 0,11843 | 0,20468  ± 0,11434 | 0,25660  ± 0,14129 |
| Concentration of small VLDL particles mol/l | 0,00001  ± 0,00001 | 0,00001  ± 0,00001 | 0,00001  ± 0,00001 | 0,00001  ± 0,00001 |
| Total lipids in small VLDL mmol/l | 0,47840  ± 0,18358 | 0,56667  ± 0,16159 | 0,52994  ± 0,19052 | 0,59808  ± 0,19304 |
| Phospholipids in small VLDL mmol/l | 0,11422  ± 0,03912 | 0,13220  ± 0,03398 | 0,12677  ± 0,03822 | 0,13871  ± 0,04091 |
| Total cholesterol in small VLDL mmol/l | 0,19200  ± 0,07303 | 0,23118  ± 0,06323 | 0,20676  ± 0,08164 | 0,23671  ± 0,07204 |
| Cholesterol esters in small VLDL mmol/l | 0,12265  ± 0,04872 | 0,14897  ± 0,04266 | 0,13039  ± 0,05541 | 0,15065  ± 0,04687 |
| Free cholesterol in small VLDL mmol/l | 0,06934  ± 0,02582 | 0,08221  ± 0,02291 | 0,07637  ± 0,02703 | 0,08606  ± 0,02717 |
| Triglycerides in small VLDL mmol/l | 0,17218  ± 0,07664 | 0,20329  ± 0,07541 | 0,19640  ± 0,07382 | 0,22265  ± 0,08921 |
| Concentration of very small VLDL particles mol/l | 0,00001  ± 0,00001 | 0,00001  ± 0,00001 | 0,00001  ± 0,00001 | 0,00001  ± 0,00001 |
| Total lipids in very small VLDL mmol/l | 0,45181  ± 0,10725 | 0,51300  ± 0,11618 | 0,46992  ± 0,12292 | 0,51625  ± 0,12516 |
| Phospholipids in very small VLDL mmol/l | 0,12251  ± 0,02962 | 0,13992  ± 0,03760 | 0,12405  ± 0,03404 | 0,14077  ± 0,03961 |
| Total cholesterol in very small VLDL mmol/l | 0,23604  ± 0,05796 | 0,26748  ± 0,06164 | 0,24424  ± 0,06590 | 0,26368  ± 0,06185 |
| Cholesterol esters in very small VLDL mmol/l | 0,16604  ± 0,04087 | 0,18795  ± 0,04090 | 0,17170  ± 0,04645 | 0,18436  ± 0,04010 |
| Free cholesterol in very small VLDL mmol/l | 0,06999  ± 0,01850 | 0,07953  ± 0,02216 | 0,07253  ± 0,02069 | 0,07930  ± 0,02289 |
| Triglycerides in very small VLDL mmol/l | 0,09327  ± 0,02765 | 0,10559  ± 0,03114 | 0,10163  ± 0,02760 | 0,11180  ± 0,03636 |
| Concentration of IDL particles mol/l | 0,00001  ± 0,00001 | 0,00001  ± 0,00001 | 0,00001  ± 0,00001 | 0,00001  ± 0,00001 |
| Total lipids in IDL mmol/l | 0,90457  ± 0,23408 | 1,03030  ± 0,27909 | 0,88513  ± 0,24806 | 1,02195  ± 0,29028 |
| Phospholipids in IDL mmol/l | 0,24443  ± 0,05848 | 0,27365  ± 0,07048 | 0,23716  ± 0,06017 | 0,27166  ± 0,07328 |
| Total cholesterol in IDL mmol/l | 0,55303  ± 0,16173 | 0,64008  ± 0,19265 | 0,53832  ± 0,16635 | 0,63040  ± 0,19614 |
| Cholesterol esters in IDL mmol/l | 0,39225  ± 0,11538 | 0,45894  ± 0,13644 | 0,38456  ± 0,11978 | 0,45221  ± 0,13822 |
| Free cholesterol in IDL mmol/l l | 0,16079  ± 0,04770 | 0,18114  ± 0,05695 | 0,15377  ± 0,04772 | 0,17819  ± 0,05861 |
| Triglycerides in IDL mmol/l | 0,10711  ± 0,02000 | 0,11656  ± 0,02949 | 0,10965  ± 0,02383 | 0,11988  ± 0,03315 |
| Concentration of large LDL particles mol/l | 0,00001  ± 0,00001 | 0,00001  ± 0,00001 | 0,00001  ± 0,00001 | 0,00001  ± 0,00001 |
| Total lipids in large LDL mmol/l | 0,98434  ± 0,27414 | 1,11846  ± 0,33175 | 0,95209  ± 0,27904 | 1,11721  ± 0,34765 |
| Phospholipids in large LDL mmol/l | 0,25595  ± 0,05624 | 0,28521  ± 0,06896 | 0,24861  ± 0,05703 | 0,28483  ± 0,07138 |
| Total cholesterol in large LDL mmol/l | 0,63056  ± 0,20077 | 0,72877  ± 0,24671 | 0,60643  ± 0,19880 | 0,72610  ± 0,25572 |
| Cholesterol esters in large LDL mmol/l | 0,43422  ± 0,14915 | 0,51118  ± 0,18547 | 0,41878  ± 0,14907 | 0,51115  ± 0,19285 |
| Free cholesterol in large LDL mmol/l | 0,19633  ± 0,05247 | 0,21758  ± 0,06186 | 0,18764  ± 0,05057 | 0,21495  ± 0,06367 |
| Triglycerides in large LDL mmol/l | 0,09774  ± 0,02119 | 0,10446  ± 0,02520 | 0,09696  ± 0,02466 | 0,10628  ± 0,02879 |
| Concentration of medium LDL particles mol/l | 0,00001  ± 0,00001 | 0,00001  ± 0,00001 | 0,00001  ± 0,00001 | 0,00001  ± 0,00001 |
| Total lipids in medium LDL mmol/l | 0,53676  ± 0,15944 | 0,60983  ± 0,19712 | 0,51826  ± 0,15798 | 0,61362  ± 0,20790 |
| Phospholipids in medium LDL mmol/l | 0,15532  ± 0,03235 | 0,17180  ± 0,03794 | 0,15242  ± 0,03339 | 0,17288  ± 0,04024 |
| Total cholesterol in medium LDL mmol/l | 0,33506  ± 0,11895 | 0,38938  ± 0,15159 | 0,32055  ± 0,11350 | 0,39084  ± 0,15751 |
| Cholesterol esters in medium LDL mmol/l | 0,22316  ± 0,09384 | 0,26792  ± 0,12237 | 0,21223  ± 0,08970 | 0,27004  ± 0,12737 |
| Free cholesterol in medium LDL mmol/l | 0,11190  ± 0,02609 | 0,12146  ± 0,02975 | 0,10831  ± 0,02497 | 0,12080  ± 0,03062 |
| Triglycerides in medium LDL mmol/l | 0,04637  ± 0,01209 | 0,04865  ± 0,01312 | 0,04528  ± 0,01357 | 0,04991  ± 0,01508 |
| Concentration of small LDL particles mol/l | 0,00001  ± 0,00001 | 0,00001  ± 0,00001 | 0,00001  ± 0,00001 | 0,00001  ± 0,00001 |
| Total lipids in small LDL mmol/l | 0,35651  ± 0,09915 | 0,39675  ± 0,11998 | 0,34543  ± 0,09540 | 0,39917  ± 0,12534 |
| Phospholipids in small LDL mmol/l | 0,11331  ± 0,02248 | 0,12184  ± 0,02448 | 0,11122  ± 0,02291 | 0,12240  ± 0,02525 |
| Total cholesterol in small LDL mmol/l | 0,21557  ± 0,07299 | 0,24470  ± 0,09158 | 0,20632  ± 0,06689 | 0,24510  ± 0,09421 |
| Cholesterol esters in small LDL mmol/l | 0,14770  ± 0,05773 | 0,17177  ± 0,07366 | 0,13966  ± 0,05237 | 0,17257  ± 0,07612 |
| Free cholesterol in small LDL mmol/l | 0,06789  ± 0,01599 | 0,07294  ± 0,01835 | 0,06667  ± 0,01538 | 0,07254  ± 0,01850 |
| Triglycerides in small LDL mmol/l | 0,02763  ± 0,00670 | 0,03020  ± 0,00864 | 0,02789  ± 0,00786 | 0,03167  ± 0,01063 |
| Concentration of very large HDL particles mol/l | 0,00001  ± 0,00001 | 0,00001  ± 0,00001 | 0,00001  ± 0,00001 | 0,00001  ± 0,00001 |
| Total lipids in very large HDL mmol/l | 0,69798  ± 0,34792 | 0,60917  ± 0,27508 | 0,61608  ± 0,34620 | 0,56142  ± 0,28592 |
| Phospholipids in very large HDL mmol/l | 0,33616  ± 0,17867 | 0,28830  ± 0,13831 | 0,28831  ± 0,17707 | 0,26396  ± 0,14680 |
| Total cholesterol in very large HDL mmol/l | 0,34436  ± 0,16507 | 0,30286  ± 0,13451 | 0,31193  ± 0,16402 | 0,27973  ± 0,13741 |
| Cholesterol esters in very large HDL mmol/l | 0,25406  ± 0,11552 | 0,22597  ± 0,09431 | 0,23287  ± 0,11437 | 0,20980  ± 0,09597 |
| Free cholesterol in very large HDL mmol/l | 0,09030  ± 0,05053 | 0,07688  ± 0,04045 | 0,07905  ± 0,05054 | 0,06992  ± 0,04168 |
| Triglycerides in very large HDL mmol/l | 0,01750  ± 0,00882 | 0,01803  ± 0,00738 | 0,01587  ± 0,00943 | 0,01774  ± 0,00739 |
| Concentration of large HDL particles mol/l | 0,00001  ± 0,00001 | 0,00001  ± 0,00001 | 0,00001  ± 0,00001 | 0,00001  ± 0,00001 |
| Total lipids in large HDL mmol/l | 0,93898  ± 0,42119 | 0,84747  ± 0,34444 | 0,81344  ± 0,40113 | 0,78361  ± 0,37201 |
| Phospholipids in large HDL mmol/l | 0,44524  ± 0,17554 | 0,41094  ± 0,14665 | 0,39149  ± 0,16498 | 0,38298  ± 0,16087 |
| Total cholesterol in large HDL mmol/l | 0,46220  ± 0,23532 | 0,40243  ± 0,19003 | 0,39354  ± 0,22564 | 0,36902  ± 0,20285 |
| Cholesterol esters in large HDL mmol/l | 0,35821  ± 0,17613 | 0,31430  ± 0,14295 | 0,30649  ± 0,16853 | 0,28892  ± 0,15313 |
| Free cholesterol in large HDL mmol/l | 0,10397  ± 0,05928 | 0,08814  ± 0,04732 | 0,08703  ± 0,05723 | 0,08010  ± 0,04997 |
| Triglycerides in large HDL mmol/l | 0,03160  ± 0,01467 | 0,03409  ± 0,01546 | 0,02846  ± 0,01634 | 0,03158  ± 0,01590 |
| Concentration of medium HDL particles mol/l | 0,00001  ± 0,00001 | 0,00001  ± 0,00001 | 0,00001  ± 0,00001 | 0,00001  ± 0,00001 |
| Total lipids in medium HDL mmol/l | 0,76164  ± 0,12142 | 0,79912  ± 0,14986 | 0,74378  ± 0,13782 | 0,80049  ± 0,14911 |
| Phospholipids in medium HDL mmol/l | 0,37704  ± 0,05493 | 0,39193  ± 0,06426 | 0,36931  ± 0,06353 | 0,39165  ± 0,06488 |
| Total cholesterol in medium HDL mmol/l | 0,34979  ± 0,06569 | 0,36554  ± 0,08260 | 0,33617  ± 0,06984 | 0,36525  ± 0,08035 |
| Cholesterol esters in medium HDL mmol/l | 0,28129  ± 0,05191 | 0,29346  ± 0,06545 | 0,27026  ± 0,05451 | 0,29370  ± 0,06368 |
| Free cholesterol in medium HDL mmol/l | 0,06848  ± 0,01449 | 0,07207  ± 0,01766 | 0,06588  ± 0,01610 | 0,07155  ± 0,01720 |
| Triglycerides in medium HDL mmol/l | 0,03482  ± 0,01282 | 0,04164  ± 0,01357 | 0,03831  ± 0,01285 | 0,04358  ± 0,01524 |
| Concentration of small HDL particles mol/l | 0,00001  ± 0,00001 | 0,00001  ± 0,00001 | 0,00001  ± 0,00001 | 0,00001  ± 0,00001 |
| Total lipids in small HDL mmol/l | 0,98188  ± 0,09102 | 1,03109  ± 0,11718 | 0,98891  ± 0,10802 | 1,04032  ± 0,11997 |
| Phospholipids in small HDL mmol/l | 0,55335  ± 0,06511 | 0,57814  ± 0,07448 | 0,56425  ± 0,07190 | 0,58361  ± 0,08076 |
| Total cholesterol in small HDL mmol/l | 0,38449  ± 0,04294 | 0,40356  ± 0,06002 | 0,37722  ± 0,04391 | 0,40531  ± 0,05570 |
| Cholesterol esters in small HDL mmol/l | 0,28020  ± 0,03925 | 0,29483  ± 0,05359 | 0,27227  ± 0,03703 | 0,29607  ± 0,05043 |
| Free cholesterol in small HDL mmol/l | 0,10428  ± 0,01098 | 0,10873  ± 0,01373 | 0,10493  ± 0,01326 | 0,10923  ± 0,01397 |
| Triglycerides in small HDL mmol/l | 0,04406  ± 0,01019 | 0,04939  ± 0,01340 | 0,04750  ± 0,00943 | 0,05141  ± 0,01567 |
| Serum total cholesterol mmol/l | 3,83438  ± 0,87695 | 4,15702  ± 0,92962 | 3,69900  ± 0,88294 | 4,11796  ± 0,95063 |
| Total cholesterol in VLDL mmol/l | 0,55934  ± 0,23191 | 0,67899  ± 0,19423 | 0,60865  ± 0,26181 | 0,70459  ± 0,22803 |
| Remnant cholesterol non HDL non LDL cholesterol mmol/l | 1,11235  ± 0,34667 | 1,31909  ± 0,35307 | 1,14690  ± 0,39657 | 1,33504  ± 0,38228 |
| Total cholesterol in LDL mmol/l | 1,18115  ± 0,39046 | 1,36281  ± 0,48812 | 1,13321  ± 0,37767 | 1,36202  ± 0,50598 |
| Total cholesterol in HDL mmol/l | 1,54079  ± 0,42234 | 1,47511  ± 0,33785 | 1,41879  ± 0,39697 | 1,42093  ± 0,34582 |
| Total cholesterol in HDL2 mmol/l | 1,03776  ± 0,39670 | 0,96189  ± 0,31108 | 0,91991  ± 0,37370 | 0,91326  ± 0,31902 |
| Total cholesterol in HDL3 mmol/l | 0,50305  ± 0,03717 | 0,51320  ± 0,03523 | 0,49885  ± 0,03383 | 0,50769  ± 0,03517 |
| Esterified cholesterol mmol/l | 2,71638  ± 0,60124 | 2,93892  ± 0,65465 | 2,64018  ± 0,60538 | 2,91679  ± 0,66466 |
| Free cholesterol mmol/l | 1,11798  ± 0,28517 | 1,21807  ± 0,28091 | 1,05895  ± 0,28447 | 1,20119  ± 0,29035 |
| Serum total triglycerides mmol/l | 0,94918  ± 0,34606 | 1,13335  ± 0,39930 | 1,04258  ± 0,37324 | 1,23320  ± 0,49088 |
| Triglycerides in VLDL mmol/l | 0,54238  ± 0,30907 | 0,68986  ± 0,32928 | 0,63268  ± 0,31935 | 0,78019  ± 0,40341 |
| Triglycerides in LDL mmol/l | 0,17174  ± 0,03938 | 0,18332  ± 0,04649 | 0,17013  ± 0,04561 | 0,18786  ± 0,05397 |
| Triglycerides in HDL mmol/l | 0,12797  ± 0,03055 | 0,14365  ± 0,03612 | 0,13014  ± 0,03687 | 0,14531  ± 0,03824 |
| Diacylglycerol mmol/l | 0,00595  ± 0,00742 | 0,01310  ± 0,00941 | 0,00803  ± 0,00817 | 0,01464  ± 0,01038 |
| Total phosphoglycerides mmol/l | 1,72481  ± 0,35777 | 1,80953  ± 0,32869 | 1,68873  ± 0,39855 | 1,80450  ± 0,33755 |
| Phosphatidyl choline and other cholines mmol/l | 1,75319  ± 0,34612 | 1,82780  ± 0,31542 | 1,70673  ± 0,37953 | 1,81879  ± 0,32183 |
| Sphingomyelins mmol/l | 0,45269  ± 0,08790 | 0,45486  ± 0,08554 | 0,42796  ± 0,08442 | 0,44758  ± 0,08043 |
| Total cholines mmol/l | 2,13569  ± 0,39055 | 2,20741  ± 0,36958 | 2,06809  ± 0,40698 | 2,18512  ± 0,36921 |
| Apolipoprotein AI g/l | 1,49250  ± 0,25438 | 1,49375  ± 0,19973 | 1,41845  ± 0,23784 | 1,47238  ± 0,19703 |
| Apolipoprotein B g/l | 0,70244  ± 0,15333 | 0,79668  ± 0,17177 | 0,71082  ± 0,17394 | 0,81146  ± 0,19038 |
| Ratio of apolipoprotein B to apolipoprotein AI | 0,47773  ± 0,10706 | 0,53839  ± 0,11875 | 0,50532  ± 0,11285 | 0,55645  ± 0,13270 |
| Total fatty acids mmol/l | 9,73688  ± 1,78866 | 10,42051  ± 1,80381 | 9,73191  ± 2,05372 | 10,55854  ± 1,99630 |
| @226 docosa hexa enoic acid mmol/l | 0,17572  ± 0,05951 | 0,20157  ± 0,06563 | 0,17816  ± 0,06859 | 0,19671  ± 0,06436 |
| @182 linoleic acid mmol/l | 2,38763  ± 0,55148 | 2,47908  ± 0,50911 | 2,28600  ± 0,57749 | 2,49848  ± 0,55731 |
| Conjugated linoleic acid mmol/l | 0,02082  ± 0,01696 | 0,01930  ± 0,01397 | 0,02409  ± 0,01874 | 0,02246  ± 0,02178 |
| Omega 3 fatty acids mmol/l | 0,51958  ± 0,18358 | 0,57801  ± 0,17280 | 0,53415  ± 0,21174 | 0,57478  ± 0,16753 |
| Omega 6 fatty acids mmol/l | 3,12825  ± 0,62315 | 3,25020  ± 0,59900 | 3,01391  ± 0,64250 | 3,23938  ± 0,62504 |
| Polyunsaturated fatty acids mmol/l | 3,64769  ± 0,75618 | 3,82815  ± 0,69473 | 3,54791  ± 0,80945 | 3,81410  ± 0,71122 |
| Monounsaturated fatty acids mmol/l | 2,44800  ± 0,45023 | 2,74873  ± 0,58209 | 2,54282  ± 0,51351 | 2,85533  ± 0,74778 |
| Saturated fatty acids mmol/l | 3,64125  ± 0,70827 | 3,84314  ± 0,71160 | 3,64082  ± 0,80388 | 3,88858  ± 0,78597 |
| Glucose mmol/l | 4,04913  ± 0,36331 | 4,24259  ± 0,57036 | 4,04191  ± 0,38666 | 4,31300  ± 0,65729 |
| Lactate mmol/l | 1,65313  ± 0,35103 | 1,63969  ± 0,46063 | 1,67464  ± 0,35925 | 1,77087  ± 0,52038 |
| Pyruvate mmol/l | 0,07170  ± 0,02505 | 0,07503  ± 0,02732 | 0,07641  ± 0,02223 | 0,07825  ± 0,02735 |
| Citrate mmol/l | 0,10854  ± 0,02144 | 0,10633  ± 0,01841 | 0,10858  ± 0,02312 | 0,10808  ± 0,01594 |
| Glycerol mmol/l | 0,11673  ± 0,04742 | 0,09972  ± 0,03374 | 0,12198  ± 0,05285 | 0,10471  ± 0,03563 |
| Alanine mmol/l | 0,41834  ± 0,04385 | 0,41965  ± 0,06436 | 0,43027  ± 0,04429 | 0,43126  ± 0,06463 |
| Glutamine mmol/l | 0,56005  ± 0,04168 | 0,55700  ± 0,05614 | 0,55650  ± 0,04866 | 0,55119  ± 0,05726 |
| Glycine mmol/l | 0,29666  ± 0,07515 | 0,29680  ± 0,06629 | 0,29426  ± 0,08819 | 0,30704  ± 0,07931 |
| Histidine mmol/l | 0,05579  ± 0,00914 | 0,05897  ± 0,00857 | 0,05780  ± 0,01018 | 0,05931  ± 0,00891 |
| Isoleucine mmol/l | 0,04376  ± 0,00874 | 0,04908  ± 0,01360 | 0,04674  ± 0,00783 | 0,05040  ± 0,01340 |
| Leucine mmol/l | 0,06445  ± 0,00972 | 0,07439  ± 0,01676 | 0,06681  ± 0,00972 | 0,07569  ± 0,01689 |
| Valine mmol/l | 0,14703  ± 0,02307 | 0,16684  ± 0,03125 | 0,15135  ± 0,02267 | 0,16781  ± 0,03126 |
| Phenylalanine mmol/l | 0,07381  ± 0,01385 | 0,07452  ± 0,00934 | 0,07517  ± 0,01482 | 0,07561  ± 0,01040 |
| Tyrosine mmol/l | 0,05397  ± 0,01273 | 0,05676  ± 0,01110 | 0,05609  ± 0,01450 | 0,05737  ± 0,00993 |
| Acetate mmol/l | 0,03284  ± 0,00699 | 0,04069  ± 0,01372 | 0,03124  ± 0,00746 | 0,03993  ± 0,01095 |
| Acetoacetate mmol/l | 0,03513  ± 0,01807 | 0,03136  ± 0,01269 | 0,03065  ± 0,01248 | 0,03010  ± 0,01201 |
| @3 hydroxybutyrate mmol/l | 0,12275  ± 0,07800 | 0,11178  ± 0,06700 | 0,09930  ± 0,05255 | 0,10129  ± 0,04913 |
| Creatinine mmol/l | 0,05786  ± 0,01337 | 0,05814  ± 0,00782 | 0,05919  ± 0,01578 | 0,06003  ± 0,01067 |
| Albumin mmol/l | 0,08057  ± 0,00586 | 0,08112  ± 0,00786 | 0,07923  ± 0,00635 | 0,08102  ± 0,00785 |
| Glycoproteinacetyls mainly a1 acidglycoprotein mmol/l | 1,23446  ± 0,13916 | 1,29069  ± 0,18543 | 1,22657  ± 0,16492 | 1,29264  ± 0,19333 |
| Phenylalanie ration to thyrosine | 1,39150  ± 0,21023 | 1,34290  ± 0,22687 | 1,36430  ± 0,16555 | 1,33860  ± 0,20400 |

Group 1, Subject with osteopororsis and CAC; Group 2, Subjects with normal T-score and no CAC; Group 3, Subjects with osteoporosis and highest cIMT tertile; Group 4, Subjects with normal T-score and lowest cIMT tertile; SD, standard deviation; VLDL, Very Low Density Lipoprotein; IDL, Intermediate Density Lipoprotein; LDL, Low Density Lipoprotein; HDL, High Density Lipoprotein
